# Supplementary material
Source: Elsevier journal article supplement (https://www.sciencedirect.com/science/article/pii/S0213911117302650)
Supplement: mmc1 [file S0213911117302650:mmc1.pdf]

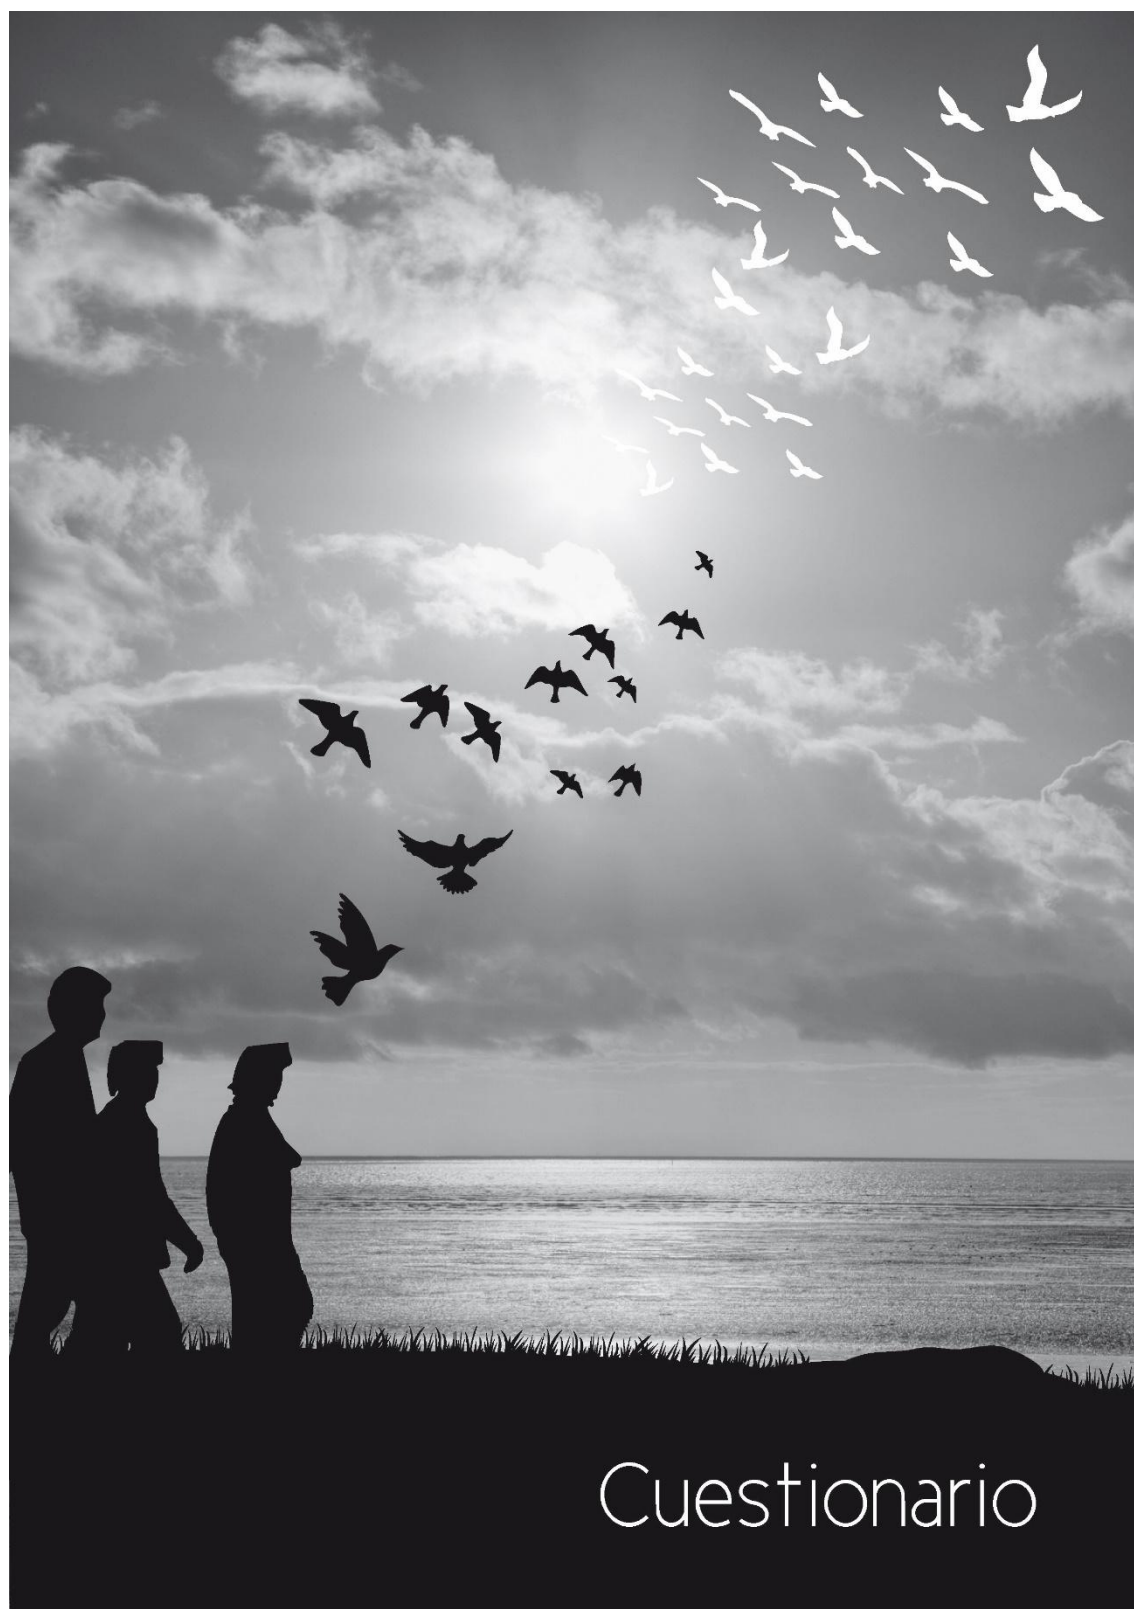

# CUESTIONARIO

## Decisiones a tomar al final de su vida

Actualmente se está desarrollando en la Comunidad de Madrid un Proyecto de Investigación en Atención Primaria, para ello es necesario una pequeña muestra de la población residente en dicha Comunidad de Madrid, por este motivo solicitamos su colaboración.

Nos interesa conocer su opinión ante diversas situaciones que se podrían plantear al final de la vida, para ello se ha elaborado un cuestionario de 42 preguntas divididas en 6 módulos, en el enunciado de cada una de ellas se describe brevemente el objetivo de dicho cuestionario.

Queda garantizada la completa confidencialidad de los datos obtenidos en su cuestionario, en el más estricto cumplimiento de la normativa vigente sobre protección de datos personales.

### Módulo 1

En este primer punto, nos interesaría conocer las decisiones que desearía tomar al final de su vida con respecto a su salud, estas incluyen tanto los cuidados físicos, los psíquicos y espirituales, así como, con quién, cómo y dónde desearía estar en esos momentos.

Evalúe como considera su estado de salud actual:

1 (Marque con una X en la escala, el número elegido del 1 al 10).

Muy mala 1 2 3 4 5 6 7 8 9 10 Muy buena

¿Recibe Ud. tratamiento médico convencional (medicación, cirugía, rehabilitación, etc.)?:

2 ☐ Sí ☐ No ☐ No Sabe ☐ No Contesta

¿Recibe Ud. tratamiento médico complementario (medicina natural, acupuntura, homeopatía, etc.)?:

3 ☐ Sí ☐ No ☐ No Sabe ☐ No Contesta

4 En ocasiones, al final de la vida hay que tomar decisiones respecto al cuidado físico, emocional y espiritual. ¿Le gustaría decidir a Ud., personalmente, qué hacer cuando llegue ese momento final?:

☐ Sí ☐ No ☐ No Sabe ☐ No Contesta

Si contesta que **No** a la pregunta 4:

5 ¿Le gustaría que otras personas decidieran por Ud.?:

☐ Sí ☐ No ☐ No Sabe ☐ No Contesta

Si contesta que **Sí** a la pregunta 5:

6 ¿Quién le gustaría que decidiera por Ud.? (puede marcar más de una respuesta):

☐ Familiares (pareja, padres, hijos, hermanos) ☐ Amigos ☐ Médico que le atiende ☐ Otras personas, ¿quiénes? \_\_\_\_\_

Ha pensado alguna vez. ¿Cómo le gustaría a Ud. llegar al término de su vida?:

7 ☐ Sí ☐ No ☐ No Sabe ☐ No Contesta

Si contesta que **Sí** a la pregunta 7:  
 8 ¿Cómo le gustaría que fuera ese momento?:  
☐ De Repente ☐ Dándose cuenta de que está abandonando este mundo ☐ Dormirse y no despertarse ☐ Indiferente ☐ ¿De qué otra forma? \_\_\_\_\_

9 ¿Dónde le gustaría a Ud. que transcurrieran los últimos momentos de su vida?:  
☐ Casa ☐ Hospital/Residencia ☐ Indiferente ☐ No Sabe ☐ Otro lugar, ¿cuál? \_\_\_\_\_

10 ¿Qué personas le gustaría que le acompañaran en el momento final de su vida? (puede marcar más de una respuesta):  
☐ Familia/amigos ☐ Equipo Médico (médico, enfermera, etc) ☐ Solo ☐ No Sabe ☐ Otras personas, ¿quiénes? \_\_\_\_\_

11 ¿Ha acompañado a algún ser querido en los últimos momentos de su vida?:  
☐ Sí ☐ No ☐ No Sabe ☐ No Contesta

Si contesta que **Sí** a la pregunta 11:  
 12 ¿Cómo recuerda usted esa experiencia de acompañamiento?:  
 (Marque con una X en la escala, el número elegido del 1 al 10).  
 Muy negativa ☐ 1 ☐ 2 ☐ 3 ☐ 4 ☐ 5 ☐ 6 ☐ 7 ☐ 8 ☐ 9 ☐ 10 Muy positiva

## Módulo 2

El actual Plan Estratégico de Cuidados Paliativos de la Comunidad de Madrid "Consejería de Sanidad", reúne a numerosos profesionales y expertos en la materia (médicos, enfermeras, psicólogos, etc.). Con la colaboración de todos ellos se ha elaborado un programa para abordar la enfermedad avanzada e incurable, pretendiendo con ello mejorar la calidad de vida, tanto del que afronta la enfermedad como el de sus familiares. En dicho programa se considera: el diagnóstico, la prevención y el alivio del sufrimiento, el tratamiento del dolor, así como el de los problemas sociales, físicos, psíquicos y espirituales que acompañan a ese momento difícil de la vida.

13 ¿Conoce Ud. la existencia de estos Servicios de Cuidados Paliativos?:  
☐ Sí ☐ No ☐ No Sabe ☐ No Contesta

14 ¿Algún familiar o allegado suyo ha recibido Cuidados Paliativos?:  
☐ Sí ☐ No ☐ No Sabe ☐ No Contesta

Si contesta que **Sí** a la pregunta 14:  
 15 ¿Dónde ha recibido su familiar o allegado Cuidados Paliativos?:  
☐ Casa ☐ Hospital ☐ Residencia ☐ No Sabe ☐ Otro lugar, ¿cuál? \_\_\_\_\_



- Si contesta que **Sí** a la pregunta 14:
- 16 ¿Cómo calificaría la atención y el cuidado prestados en estos Servicios de Cuidados Paliativos?  
(Marque con una X en la escala, el número elegido del 1 al 10):
- Muy malo 

|   |   |   |   |   |   |   |   |   |    |
|---|---|---|---|---|---|---|---|---|----|
| 1 | 2 | 3 | 4 | 5 | 6 | 7 | 8 | 9 | 10 |
|---|---|---|---|---|---|---|---|---|----|

 Muy bueno

- Si Ud. sufriera una enfermedad avanzada e incurable, ¿desearía recibir Cuidados Paliativos?:  
(Marque con una X en la escala, el número elegido del 1 al 10).
- 17 Totalmente en desacuerdo 

|   |   |   |   |   |   |   |   |   |    |
|---|---|---|---|---|---|---|---|---|----|
| 1 | 2 | 3 | 4 | 5 | 6 | 7 | 8 | 9 | 10 |
|---|---|---|---|---|---|---|---|---|----|

 Totalmente de acuerdo

- Si Ud. estuviera **consciente**, ¿dónde preferiría recibir los Cuidados Paliativos?:
- 18 ☐ Casa ☐ Hospital ☐ Residencia ☐ No Sabe ☐ Otro lugar, ¿cuál? \_\_\_\_\_

- Si Ud. estuviera **inconsciente**, ¿dónde preferiría recibir los Cuidados Paliativos?:
- 19 ☐ Casa ☐ Hospital ☐ Residencia ☐ No Sabe ☐ Otro lugar, ¿cuál? \_\_\_\_\_

### Módulo 3

La vida nos enfrenta a diferentes situaciones comprometidas y una de ellas es el momento final de la existencia, en ocasiones unido a problemas de difícil control en distintos niveles: físico (ej.: asfixia, vómito, sangrado, convulsiones), psicológico (ej.: crisis de ansiedad, pánico), etc. En estos momentos de gran sufrimiento, a pesar de la ayuda de los Cuidados Paliativos y de la asistencia médica bien realizada, se podría plantear, el tener que recurrir a una muerte médicamente asistida. Este concepto de muerte asistida engloba a varias intervenciones como son: la eutanasia y el suicidio asistido.

- **La eutanasia** consiste en la actuación de un profesional (ej.: administración de medicamentos inyectables a dosis letales) que produce deliberadamente la muerte de un paciente con una enfermedad irreversible.

- **El suicidio asistido** consiste en la intervención de un profesional que proporciona los medios materiales (ej.: medicamentos en comprimidos para tomar) y/o intelectuales (libros) imprescindibles para que el paciente con una enfermedad irreversible, pueda acabar con su vida cuando lo desee.

Actualmente estas dos actuaciones **no están legalizadas en España**.

(Las siguientes preguntas van a estar colocadas en una tabla. En las 6 filas están dispuestas las preguntas del número 20 al 25. En las 12 columnas están distribuidas las respuestas en una escala del número 1 al 10. Ud. debe marcar una sola respuesta, seleccionada con una X).

1  
2  
3  
4  
5  
6  
7  
8  
9  
10  
11  
12  
13  
14  
15  
16  
17  
18  
19  
20  
21  
22  
23  
24  
25  
26  
27  
28  
29  
30  
31  
32  
33  
34  
35  
36  
37  
38  
39  
40  
41  
42  
43  
44  
45  
46  
47  
48  
49  
50  
51  
52  
53  
54  
55  
56  
57  
58  
59  
60  
61  
62  
63  
64  
65

|    |                                                                                                                                                                    | Totalmente<br>en desacuerdo | 1 | 2 | 3 | 4 | 5 | 6 | 7 | 8 | 9 | 10 | Totalmente<br>de acuerdo |
|----|--------------------------------------------------------------------------------------------------------------------------------------------------------------------|-----------------------------|---|---|---|---|---|---|---|---|---|----|--------------------------|
| 20 | ¿Considera que la eutanasia es moralmente aceptable?                                                                                                               |                             |   |   |   |   |   |   |   |   |   |    |                          |
| 21 | Cuando llegue el momento final de su vida, si tuviera una enfermedad irreversible y una experiencia de sufrimiento intolerable, ¿solicitaría la eutanasia?         |                             |   |   |   |   |   |   |   |   |   |    |                          |
| 22 | ¿Considera que en un futuro debería legalizarse la eutanasia?                                                                                                      |                             |   |   |   |   |   |   |   |   |   |    |                          |
| 23 | ¿Considera que el suicidio asistido es moralmente aceptable?                                                                                                       |                             |   |   |   |   |   |   |   |   |   |    |                          |
| 24 | Cuando llegue el momento final de su vida, si tuviera una enfermedad irreversible y una experiencia de sufrimiento intolerable, ¿solicitaría el suicidio asistido? |                             |   |   |   |   |   |   |   |   |   |    |                          |
| 25 | ¿Considera que en un futuro debería legalizarse el suicidio asistido?                                                                                              |                             |   |   |   |   |   |   |   |   |   |    |                          |

Módulo 4

Las instrucciones previas II.PP. (o voluntades anticipadas, testamento vital...) son los deseos que una persona manifiesta anticipadamente sobre el cuidado, la atención médica y el destino de su cuerpo, para que esa voluntad se cumpla, en el momento en que esa persona llegara a encontrarse en situación de no poder expresar su voluntad personalmente, por su grave deterioro físico y/o psíquico. Por este motivo es esencial que los familiares, allegados y el personal médico que le atienda conozcan su existencia.

En la Comunidad de Madrid, se ha creado el Registro de Instrucciones Previas para recopilar y custodiar las Instrucciones Previas que los madrileños, mayores de 18 años, han realizado por escrito y registrado en presencia de: un notario, tres testigos o del funcionario de dicho Registro.

26 ¿Conoce que existe la posibilidad de hacer Instrucciones Previas?:  
☐ Sí ☐ No ☐ No Sabe ☐ No Contesta

27 ¿Conoce la existencia del Registro de Instrucciones Previas de la Comunidad de Madrid?:  
☐ Sí ☐ No ☐ No Sabe ☐ No Contesta

28 ¿Tiene Ud. **realizado** su documento de Instrucciones Previas?:  
☐ Sí ☐ No ☐ No Sabe ☐ No Contesta

Si contesta que **No** a la pregunta 28:  
29 ¿Estaría interesado en **realizar** su documento de Instrucciones Previas?:  
☐ Sí ☐ No ☐ No Sabe ☐ No Contesta

30 ¿Tiene Ud. **registrado** su documento de Instrucciones Previas?:

☐ Sí ☐ No ☐ No Sabe ☐ No Contesta

Si contesta que **No** a la pregunta 30:

31 ¿Estaría interesado en registrar su documento de Instrucciones Previas?:

☐ Sí ☐ No ☐ No Sabe ☐ No Contesta

32 ¿Sus familiares y/o allegados conocen su voluntad en el momento final de su vida?:

☐ Sí ☐ No ☐ No Sabe ☐ No Contesta

33 ¿Informará a su médico de familia o los médicos que le atiendan, de su voluntad para el momento final de su vida?:

☐ Sí ☐ No ☐ No Sabe ☐ No Contesta

34 ¿Pertenece a alguna asociación que defienda las últimas voluntades del paciente?:

☐ Sí ☐ No ☐ No Sabe ☐ No Contesta

## Módulo 5

Actualmente, se está valorando mucho la dimensión espiritual del ser humano ya que tiene un carácter universal. Se podría definir la espiritualidad en el contexto del final de la vida como la aspiración profunda e íntima del ser humano, el anhelo de una visión de la vida y la realidad que integre, conecte, trascienda y de sentido a la existencia. Se asociaría también al desarrollo de unas cualidades y valores que fomenten el amor y la paz. La espiritualidad no es sinónimo de religión y se puede tener una dimensión espiritual sin tener creencias religiosas.

35 ¿Considera Ud. que el acompañamiento y la ayuda espiritual en el proceso final de la vida serían de gran apoyo?:

(Marque con una X en la escala, el número elegido del 1 al 10).

Totalmente en desacuerdo 

|   |   |   |   |   |   |   |   |   |    |
|---|---|---|---|---|---|---|---|---|----|
| 1 | 2 | 3 | 4 | 5 | 6 | 7 | 8 | 9 | 10 |
|---|---|---|---|---|---|---|---|---|----|

 Totalmente de acuerdo

36 ¿Solicitaría Ud. acompañamiento espiritual en el proceso final de su vida?:

☐ Sí ☐ No ☐ No Sabe ☐ No Contesta

Si contesta que **Sí** a la pregunta 36:

¿Qué personas desearía le acompañaran espiritualmente? (puede marcar más de una respuesta):

37 ☐ Familia/amigos ☐ Psicólogo ☐ Representante religioso (sacerdote, líder espiritual, etc) ☐ Equipo Médico (médico, enfermera, etc) ☐ Otras personas ¿quiénes? \_\_\_\_\_

Evalúe la frecuencia con la que Ud. practica sus creencias:

38 (Marque con una X en la escala, el número elegido del 1 al 10).

Ninguna 

|   |   |   |   |   |   |   |   |   |    |
|---|---|---|---|---|---|---|---|---|----|
| 1 | 2 | 3 | 4 | 5 | 6 | 7 | 8 | 9 | 10 |
|---|---|---|---|---|---|---|---|---|----|

 Muy frecuentemente



## Módulo 6

Como paso previo a poder generalizar los resultados de este estudio, precisamos conocer algunas características de la población como son: sexo, estado civil, profesión, estudios y edad.

39 ¿Cuál es su sexo?:

☐ Hombre ☐ Mujer

40 ¿Cuál es su estado civil?:

☐ Soltero ☐ Casado/  
Vive en pareja ☐ Divorciado/Separado ☐ Viudo ☐ No Contesta

41 ¿Qué nivel de estudios tiene Ud.?:

☐ Ninguno ☐ Primarios ☐ Medios ☐ Superiores ☐ Otros estudios: \_\_\_\_\_

42 ¿Entre que franja de edad se encuentra Ud.?:

☐ 18-30 años ☐ 31-50 años ☐ 51-70 años ☐ 71-90 años ☐ 91 años o más

---

MUCHAS GRACIAS POR SU COLABORACIÓN

---

## Instrucciones para rellenar el Cuestionario

- Su colaboración es muy necesaria para poder realizar un Proyecto de Investigación, por ello solicitamos su **opinión totalmente anónima** a través de un Cuestionario.
- El cuestionario se ha realizado sobre el tema: **“Decisiones al final de la vida”**. Sabemos que es un tema de actualidad, muy personal y poco estudiado; por tanto, **su opinión es fundamental** para llevar a cabo la investigación.
- El cuestionario consta de **6 partes** llamadas **Módulos**, en los que hay siempre una introducción al tema que se pregunta para aclararlo.
- El cuestionario deberá rellenarlo poniendo en las casillas correspondientes a las respuestas una **X**. En algunas preguntas **solo** con una respuesta es suficiente, en otras puede marcar más de una respuesta, cuando se lo solicite.
- Cuando acabe de rellenar el cuestionario, lo deposita en la **Planta Baja del Centro de Salud Jazmín** (enfrente de la Administración) en una **CAJA** que indica **CUESTIONARIO**.
- Dispone de **2 semanas** para completarlo tranquilamente.
- Si Ud. no tiene intención de rellenarlo, por el motivo que sea, lo deposita igualmente en la **CAJA** del Centro de Salud, pero **devuélvalo** en blanco; puede volver a utilizarse.

**“MUCHAS GRACIAS POR COLABORAR CON  
NOSOTROS Y DEDICARNOS SU TIEMPO**
